# Supplementary material for: Two Acinetobacter baumannii Isolates Obtained From a Fatal Necrotizing Fasciitis Infection Display Distinct Genomic and Phenotypic Characteristics in Comparison to Type Strains
Source: Front Cell Infect Microbiol. 2021 Apr 12;11:635673. doi: 10.3389/fcimb.2021.635673 (PMC8072282; doi:10.3389/fcimb.2021.635673)
Supplement: Supplementary file 6 [file Table_5.xlsx]

## Sheet: Non-hypothetical NECRO genes 
Supplemental Table S5. Comparison summary of non-hypothetical genes shared by necro fasciitis strains
	17978	19606
Shared Genes	125	139
Percentage	0.576	0.6406
